# Supplementary material for: Gains following perceptual learning are closely linked to the initial visual acuity
Source: PubMed Central journal article supplement (PMC4848560; doi:10.1038/srep25188), 2016-04-28
Supplement: srep25188-s1.pdf [file srep25188-s1.pdf]

Gains following perceptual learning are closely linked to the initial Visual Acuity.

*Oren Yehezkel<sup>1\*</sup>, Anna Sterkin<sup>1,2\*</sup>, Maria Lev<sup>2\*</sup>, Dennis M. Levi<sup>3</sup> and Uri Polat<sup>1,2</sup>*

## Supplementary information

The VA data are plotted with the 95% confidence intervals (CIs, Supplementary information Fig. 1) for 3 subgroups of subjects from the trained group compared to the control test-retest group with the matching 3 initial VA levels into which we have binned the data of the 10 control subjects: below 0 LogMAR (4 subjects; panel a), 0.1-0.22 LogMAR (3 subjects; panel b), 0.4-0.6 LogMAR (3 subjects, panel c). The plots show that the training effects are beyond the CI range.

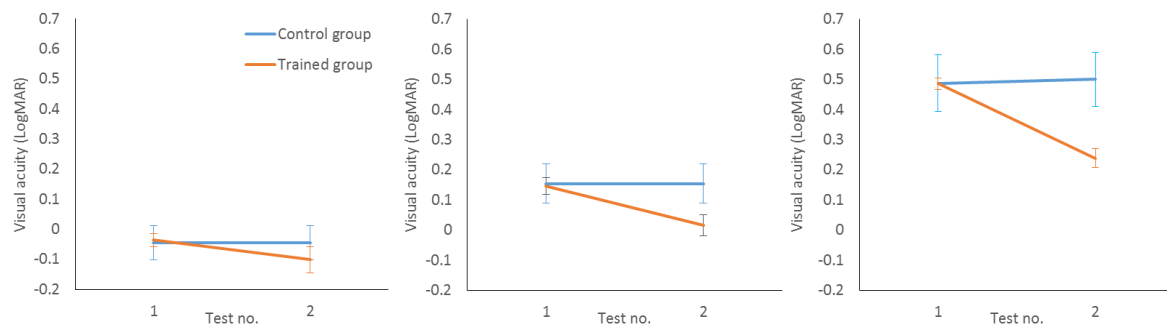

Supplementary information Figure 1. The chart VA data with the 95% confidence intervals (CIs), for the trained (orange) and control (blue) groups, for the 1<sup>st</sup> and the 2<sup>nd</sup> testing. Error bars, 95% CIs.
